# 1 Getting stuck in a rut as an emergent feature of a 2 dynamic decision-making system

3 Matthew Warburton<sup>1</sup>, Jack Brookes<sup>1, 2</sup>, Mohamed Hasan<sup>3</sup>, Matteo Leonetti<sup>3</sup>, Mehmet  
4 Dogar<sup>3</sup>, He Wang<sup>3,4</sup>, Anthony G. Cohn<sup>3</sup>, Faisal Mushtaq<sup>\*1,4</sup> & Mark A. Mon-  
5 Williams<sup>1,4,5,6</sup>

6 <sup>1</sup>School of Psychology, University of Leeds, Leeds, West Yorkshire, United Kingdom

7 <sup>2</sup>Max Planck UCL Centre for Computational Psychiatry and Ageing Research, University College  
8 London, London, United Kingdom

9 <sup>3</sup>School of Computing, University of Leeds, Leeds, West Yorkshire, United Kingdom

10 <sup>4</sup>Centre for Immersive Technologies, University of Leeds, Leeds, West Yorkshire, United Kingdom

11 <sup>5</sup>Centre for Applied Education Research, Wolfson Centre for Applied Health Research, Bradford  
12 Teaching Hospitals NHS Foundation Trust, Bradford, West Yorkshire, UK

13 <sup>6</sup>National Centre for Optics, Vision and Eye Care, University of South-Eastern Norway, Kongsberg,  
14 Hasbergs vei 36, 3616, Norway

15  
16 \*Correspondence should be addressed to Faisal Mushtaq (f.mushtaq@leeds.ac.uk), School of  
17 Psychology, University of Leeds, Leeds, United Kingdom.

18 **Competing Interest:** The authors declare that they have no competing financial or non-financial  
19 interests.

20 **Acknowledgements:** We thank Peter Culmer and Ian Flatters for their contributions on preliminary  
21 work for this project. We also thank J. Ryan Morehead for comments on a recent version of the  
22 manuscript. Authors A.G.C., F.M and M.M-W hold Fellowships from the Alan Turing Institute. This  
23 project was funded by a grant from the EPSRC Human-Like Computing Call (EP/R031193/1).

24 **Key Words:** decision-making; hysteresis; choice bias

25

## Abstract

26 Human sensorimotor decision-making has a tendency to get ‘stuck in a rut’, being biased towards  
27 selecting a previously implemented action structure (‘hysteresis’). Existing explanations cannot  
28 provide a principled account of when hysteresis will occur. We propose that hysteresis is an  
29 emergent property of a dynamical system learning from the consequences of its actions. To  
30 examine this, 152 participants moved a cursor to a target on a tablet device whilst avoiding an  
31 obstacle. Hysteresis was observed when the obstacle moved sequentially across the screen between  
32 trials, but not with random obstacle placement. Two further experiments (n = 20) showed an  
33 attenuation when time and resource constraints were eased. We created a simple computational  
34 model capturing dynamic probabilistic estimate updating that showed the same patterns of results.  
35 This provides the first computational demonstration of how sensorimotor decision-making can get  
36 ‘stuck in a rut’ through the dynamic updating of its probability estimates.

37 **Significance Statement**

38 Humans show a bias to select the organisational structure of a recently carried out action, even  
39 when an alternative option is available with lower costs. This ‘hysteresis’ is said to be more efficient  
40 than creating a new plan and it has been interpreted as a ‘design feature’ within decision-making  
41 systems. We suggest such teleological arguments are redundant, with hysteresis being a naturally  
42 emergent property of a dynamic control system that evolved to operate effectively in an uncertain  
43 and partially observable world. Empirical experimentation and simulations from a ‘first principle’  
44 computational model of decision-making were consistent with our hypothesis. The identification of  
45 such a mechanism can inform robotics research, suggesting how robotic agents can show human-  
46 like flexibility in complex dynamic environments.

47

## Introduction

48 Humans are creatures of habit and often repeat behaviours - despite the selected action having  
49 a higher cost than an available alternative. This propensity can be seen when humans continue to  
50 use the road well-travelled when moving between two buildings even after construction work has  
51 created a shorter route. The phenomenon is particularly remarkable because adult humans are  
52 generally so adept at selecting optimal movement patterns (Trommershäuser et al., 2008). Indeed,  
53 the ability of humans to rapidly and efficiently execute actions far exceeds the capabilities of even  
54 the most sophisticated robotic systems (Dogar & Srinivasa, 2012). The incredible repertoire of  
55 skilled behaviour in humans reflects the presence of learning processes that have been trained over  
56 the countless occasions when adults have interacted with the external world. These myriad  
57 interactions allow the human nervous system to accurately estimate the costs associated with  
58 various behaviours and thereby select an optimal (or close to optimal) action when presented with  
59 a goal directed task. The issue of relevance within this manuscript relates to the observation that  
60 adult humans will select different options on different occasions as a function of whether the choice  
61 is made *de novo* or following a previous successful action – despite the choices having the same  
62 relative costs on both occasions.

63 The tendency to show a bias towards a previously selected action plan can be described as  
64 ‘hysteresis’ (or the sequential effect) and is well-studied. Hysteresis effects have been found in  
65 grasp selection (Cohen & Rosenbaum, 2004, 2011; Dixon et al., 2012; Kelso et al., 1994; Kent et al.,  
66 2009; Rosenbaum & Jorgensen, 1992; Schütz et al., 2011; Short & Cauraugh, 1997; Weigelt et al.,  
67 2009), hand selection (Rostoft et al., 2002; Schweighofer et al., 2015; Weiss & Wark, 2009), and  
68 hand path priming experiments (Jax & Rosenbaum, 2007, 2009; van der Wel et al., 2007). However,  
69 there are no satisfactory explanations to account for this phenomenon. In fact, most explanations  
70 are teleological in nature: it is proposed that modifying a previously used action is more cognitively  
71 efficient than planning from scratch, so hysteresis exists to increase planning efficiency

72 (Meulenbroek et al., 1993; Rosenbaum et al., 2007; Schütz & Schack, 2019; Weiss & Wark, 2009), as  
73 indexed by reduced reaction times (RTs) when using the same action as previously (Valyear et al.,  
74 2018). The problem is that such interpretations do not provide a principled account that can  
75 explain when hysteresis will occur, why its magnitude differs under different task constraints, or  
76 why its presence is a function of the costs of the available choices.

77 We propose that the process of ‘getting stuck in a rut’ is an emergent property of a decision-  
78 making system that dynamically learns from the consequences of its actions. In order to deal with  
79 unpredicted changes in the world (and adapt to novel environmental states), an efficient system  
80 must frequently update its estimates of the success probabilities associated with a given action (in  
81 Bayesian terms, the system must continually update its priors). To update these estimates, humans  
82 must use feedback about the outcomes of their actions – actions which cause the environment to  
83 transition to a new state. We suggest that this principle – the updating of success probabilities – will  
84 naturally result in a system that shows hysteresis. In fact, it is common practice in computer science  
85 to model the environment as a POMDP (POMDP; Kaelbling et al., 1998) when designing agents that  
86 need to act under uncertainty. In a POMDP, the agent does not directly observe the environment’s  
87 state but receives an observation which is a function of the state of the environment following an  
88 action executed by the agent. POMDPs reflect well the challenges faced by the human nervous  
89 system which must infer the hidden states of the environment from the sensory inputs that follow  
90 an action (as a Markov blanket separates the nervous system from the external world; Friston,  
91 2010). The important point from the perspective of this manuscript is that the external world is not  
92 static and this means that a human agent must frequently update its internal representation (i.e. the  
93 approximate conditional density on the causes of sensory input) in order to act optimally in a noisy  
94 and changing world. The dynamical updating of the internal representation enables the human to  
95 predict the sensory input that will result from a generated action. The ability to make accurate  
96 predictions allows a human to generate an action that will produce a desired change in the sensory

97 input (i.e. achieve a goal-directed change in the external environment). It follows that efficient  
98 action selection requires frequent updating of the success probabilities associated with a given  
99 action. We hypothesised that this updating would produce hysteresis as an emergent property of  
100 the dynamical learning system.

101 In order to explore hysteresis, we needed to design a canonical task that would allow us to  
102 parametrically vary critical task parameters, reflect a naturalistic action, and produce data  
103 amenable to computational modelling. We also needed a task that would allow us to examine  
104 behaviour on a trial-by-trial basis so that we could address issues relating to the frequency of  
105 updating (e.g. whether we would observe hysteresis on a trial-by-trial basis or whether it was only  
106 manifest after a number of iterations of a given action structure). We decided to use aiming  
107 movements (moving an end effector from a start point to a target location) to meet our task  
108 requirements. We therefore created a simple multi-trial sensorimotor decision-making task in  
109 which participants needed to move around an obstacle (left or right) to hit a target (where the  
110 reward was the same for each choice). We manipulated obstacle position on each trial across blocks  
111 such that it either moved systematically across the screen or was randomly positioned across trials  
112 (Figure 1). We predicted that participants would show a strong bias towards repeating previously  
113 selected actions in the sequential condition, even when the obstacle position indicated an  
114 alternative route would be preferable. We expected that this effect would be diminished in blocks  
115 where obstacle position moved randomly across the screen.

116 We wished to explore whether the empirical data generated through our empirical  
117 investigations could be captured by a model that incorporated dynamic probabilistic estimate  
118 updating (i.e. whether hysteresis could be captured through a POMDP type model). We therefore  
119 created a model of human decision-making (Figure 2) that included a trial-by-trial update of the  
120 success probabilities associated with one action versus another. The goal of the model was to

121 simulate how an agent would respond to a choice between two options that both allow a given goal  
122 to be achieved but have different costs. The output of the model was an action that would cause the  
123 environment to transition (with a given probability) to a new state. The model was arranged such  
124 that after an action is executed the agent receives an observation which is a function of the new  
125 environmental state. This input was then used to update the success probabilities associated with  
126 the action. In many choice tasks, there is also a difference in the reward associated with the options  
127 (Dreher & Tremblay, 2009; Gold & Shadlen, 2007; Mushtaq et al., 2016), so our model incorporated  
128 an estimate of the reward to allow future studies to explore behaviour in such tasks (but in the  
129 reported experiments the reward was identical across options).

130 We were also interested in exploring the dynamical aspects of decision-making under  
131 temporal constraint. Converging evidence suggests that the decision-making process is governed by  
132 neural circuits that accumulate noisy evidence for possible options over time, with a decision  
133 triggered when sufficient evidence is accumulated to cross an action threshold (Bogacz et al., 2006;  
134 Brody & Hanks, 2016; Gold & Shadlen, 2007). It seems reasonable to suppose that the action  
135 threshold will be a function of the available time period within which a decision must be made (i.e.  
136 temporal constraints will push the system towards making a choice that might be different were  
137 more time available to weigh up the respective costs of the different options). Notably, the existence  
138 of evidence accumulation processes predicts that actions will be selected more rapidly (i.e. RTs will  
139 decrease) when there is a bias towards one action versus another. This suggests that RTs will be  
140 faster in the presence of hysteresis. Once more, it is important to emphasise that we are proposing  
141 that hysteresis is an emergent property of a dynamic learning system where faster RTs are a useful  
142 by-product of the system's organisation rather than the planned product of a system designed with  
143 an inbuilt function to produce hysteresis.

144 On the assumption that evidence accumulation processes are a core component of  
145 sensorimotor decision-making, we anticipated finding RT differences as a function of the magnitude  
146 of hysteresis associated with a given task. We further hypothesised that relaxing the temporal  
147 constraints of the task would attenuate the size of the hysteresis effect (as the available time can be  
148 used to more fully evaluate the costs of either action, reducing the reliance of the decision-making  
149 system on previous successes and failures to inform current action selection). In Experiment 2, we  
150 directly manipulated the temporal constraints of the task by creating a ‘waiting period’ before  
151 which an action could be executed. In Experiment 3, we indirectly manipulated the temporal  
152 constraints by decreasing the ‘higher order’ cognitive demands of the task. We reasoned that  
153 decreasing the cognitive constraints would allow the task goal to be identified more rapidly and  
154 thereby create a longer period in which the respective costs of the alternative actions could be  
155 computed.

156

## 157 **Methods**

### 158 **Participants**

159 In Experiment 1, 152 adults (41 males, 100 females; mean age 22.51 years, range 18– 39 years; 139  
160 self-reported right-handed; eleven participants did not report age or gender) were recruited as part  
161 of a larger motor control project. Participants for Experiment 2 (n = 20, 1 male, 19 females; mean  
162 age 19.09, range 18-20 years; 20 self-reported right-handed) and Experiment 3 (n = 20, 1 male, 19  
163 females; mean age 18.86 years, range 18-20 years; 18 self-reported right-handed) were recruited  
164 through word of mouth from the University of Leeds undergraduate population. All had normal or  
165 corrected-to-normal vision and provided informed consent to participate. Participation in these  
166 studies was incentivised through remuneration of £2 on completion of the experiment. Ethical  
167 approval was obtained from the University of Leeds ethics committee.



## 168 **Procedure**

169 Participants sat at a desk with a touchscreen computer tablet (Lenovo ThinkPad Helix 2,  
170 1920x1080 pixels, 11.6" screen, 60Hz refresh rate) placed directly in front of them and interacted  
171 with the screen using a stylus (sampled from the screen digitiser at a rate of 100Hz) in their chosen  
172 hand. Participants were shown a pictorial instruction sheet prior to starting the experiment that  
173 explained how to complete a single trial. Prior to starting the experiment, participants were  
174 instructed that each trial should be completed as quickly and accurately as possible. The core trial  
175 structure was the same across all three experiments and key differences for each study are detailed  
176 below and presented in Figure 1.

177

### 178 ***Experiment 1: Biases in Sensorimotor Decision-making***

179 In Experiment 1, we introduced a novel sensorimotor decision task in which participants were  
180 asked to select one of two possible routes around an obstacle to reach a target using a stylus on a  
181 tablet display. During each trial, participants had to stay within a 200mm high by 106mm wide  
182 workspace, displayed as a rectangle on the screen. Participants began each trial by placing the  
183 stylus on the screen and moving the cursor (5mm diameter circle) to a start-point (10mm diameter  
184 circle, horizontally central) at the bottom centre of the screen. Events in the scene (e.g. entering the  
185 start-point) were triggered when the perimeter of the cursor intersected the perimeter of another  
186 object. After a randomly sampled delay (generated by a random number generator) between 300-  
187 600ms (across all participants and experiments, there was a grand mean delay of 448ms (SD =  
188 9ms), with the mean average delay across participants ranging from 423– 475ms), the start-point  
189 changed to a colour and shape combination, randomly selected from a list of three of each (cyan,  
190 magenta, yellow; circle, square, triangle); a check-point (10mm diameter circle, horizontally  
191 central) appeared in the top centre of the screen; and an obstacle (30mm wide x 10mm high

192 rectangle) appeared equidistant between the start- and check-points, vertically central to the  
193 screen. The distance between the start and check-points was 140mm. Participants were instructed  
194 to remember the colour they were shown and move as quickly and accurately after stimulus display  
195 to the checkpoint. Participants were allowed up to 2 seconds 'preparation time' in the start-point.  
196 Upon leaving the start-point the coloured shape disappeared, and the participant had up to 500ms  
197 to reach the check-point.

198       Upon entering the check-point, the obstacle disappeared. The participant then had to wait in  
199 the check-point. After a randomly sampled delay (generated by a random number generator)  
200 between 300-600ms (across all participants and experiments, grand mean delay = 450ms, SD =  
201 11ms, range = 418-476ms), three targets at the bottom of the screen appeared, spaced equally in  
202 the horizontal axis. Each target had an invisible 10mm diameter circle used to detect the cursor  
203 hitting. The vertical distance between the check-point and targets was 150mm, with 30mm spacing  
204 between targets horizontally. Each target had a randomly assigned colour and shape combination,  
205 selected by randomly shuffling the list of three colours and three shapes and allocating the  
206 combinations to each target. Participants were instructed to move as quickly and accurately to the  
207 target of the same colour that was shown at the start-point. Participants were allowed up to 2  
208 seconds in the check-point. After leaving the check-point the participant had up to 1 second to  
209 reach the target.

210       A trial was successfully completed when the participant moved to the correct target. There  
211 were several ways to fail a trial: hitting the obstacle or task boundaries; spending too long in the  
212 start or checkpoint; moving too slowly between the start- and check-points, or moving too slowly  
213 between the check-point and target; leaving the checkpoint before the targets were revealed; and  
214 moving to the wrong coloured target. If a failure was triggered the trial was immediately  
215 terminated. Once a trial finished, visual feedback was presented for 1 second to indicate the

216 outcome of a trial, where the target turning green indicated a successful trial, and an object turning  
217 red indicated a failed trial. For failed trials, the object that turned red indicated the type of failure  
218 (e.g. if the participant hit the obstacle, it would turn red). Across all trials a running score was  
219 shown in the top left of the screen, which increased by one after each successful trial. After visual  
220 feedback had been presented for 1 second, the start-point was shown on the screen, and  
221 participants were able to begin a new trial. During the experimental trials, the mean within-subject  
222 time between the start of successful trials was 4.17 seconds, and 3.67 seconds for unsuccessful  
223 trials.

224 The experiment comprised a total of 106 trials and took approximately 10 minutes to  
225 complete. This included 4 example trials, 6 practice trials, 9 baseline trials, and 87 experimental  
226 trials made up in 3 blocks of 29 trials, shown in Figure 1d. During the example trials, the instructor  
227 showed the participant a set of 4 standard trials including two successful trials and two failed trials.  
228 Participants were provided 6 practice trials to make sure they understood the task mechanics,  
229 which included text feedback after every trial to indicate the outcome, in addition to the regular  
230 visual feedback. A baseline block followed that aimed to make participants move as quickly as they  
231 could (while maintaining accuracy) by giving text feedback telling them they needed to move more  
232 quickly if their movement time between the start- and check-point was slower than their previous  
233 fastest time (following the baselining block, across all experiments the within-subject mean  
234 movement time between the start and check-point = 369ms, SD = 47ms, range = 249 - 452ms).  
235 During each of these three blocks, the obstacle was located horizontally central to the screen, and  
236 after the completion of each block, text was displayed for 10 seconds on the screen to indicate the  
237 participant was starting a new phase of the experiment.

238 The experimental trials were then organised into three blocks, presented to the participant as  
239 one uninterrupted block. The three conditions were where the obstacle's horizontal position moved

240 sequentially between trials from the left of the screen to the right (Rightward), from the right of the  
241 screen to the left (Leftward), and where the obstacle's positions were randomly shuffled (Random).  
242 The order of the three conditions was randomly allocated per participant. Each obstacle position  
243 was presented once per block. Twenty-nine obstacle positions were used with extreme positions of  
244 -34.2mm and 34.2mm, with equally spaced jumps between each position.

245 The experimental task was developed using Unity (Unity Technologies, 2018; version 2018.1)  
246 and the Unity Experiment Framework (Brookes et al., 2019).

247

### 248 ***Experiment 2: Decreasing Temporal Constraints***

249 Experiment 2 was conducted to explore whether easing the temporal constraints placed on the  
250 decision-making system could attenuate hysteresis. In Experiment 2, participants were forced to  
251 wait while the stimuli were shown before executing the movement. Upon entering the start-point a  
252 red box appeared surrounding the start point and the participant's cursor. While the red box was  
253 visible the participant was not allowed to leave the start-point or the trial would terminate in  
254 failure. In common with Experiment 1, there was a randomly sampled delay of between 300-600ms  
255 before the stimuli were presented. However, in Experiment 2 the red box remained on the screen  
256 after stimulus display. After 1.5 seconds the red box disappeared, and the participant completed the  
257 rest of the trial as described in Experiment 1. Differences between these Experiments are  
258 illustrated in Figure 1b. In Experiment 2, the mean within-subject time between the start of  
259 successful trials was 5.50 seconds, and 4.22 seconds for unsuccessful trials in the experimental  
260 block.

261

### 262 ***Experiment 3: Reducing Task Cognitive Demands***

263 Experiment 3 was conducted to explore whether reducing the cognitive demands associated  
264 with the task could attenuate hysteresis. Participants were presented with only one target after  
265 waiting in the check-point, with the colour shown at the start of the trial always matching that of  
266 the target. The remainder of the trial followed the same structure as Experiment 1 (differences  
267 illustrated in Figure 1c). In Experiment 3, the mean within-subject time between the start of  
268 successful trials was 3.96 seconds, and 3.30 seconds for unsuccessful trials in the experimental  
269 block.

**a - Experiment 1 Trial Structure**

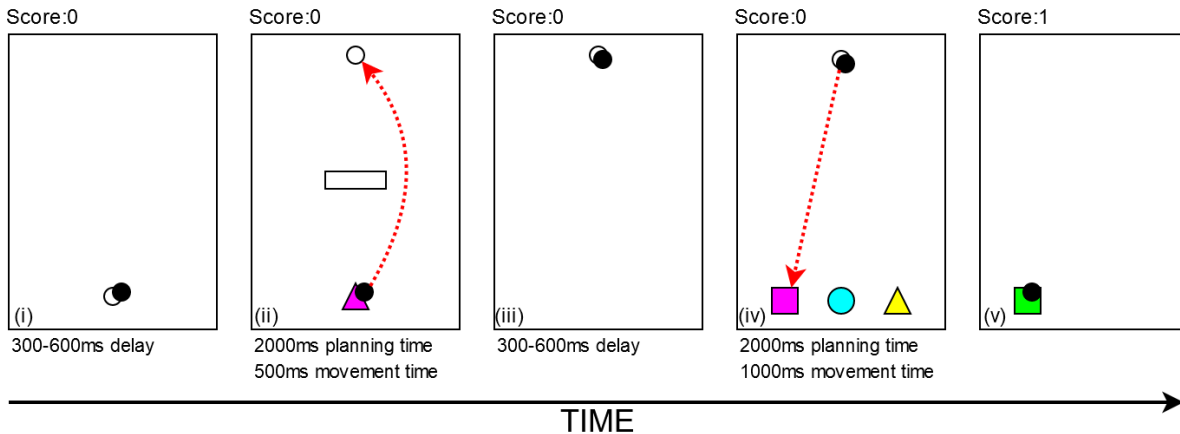

**b - Experiment 2 Trial Differences**

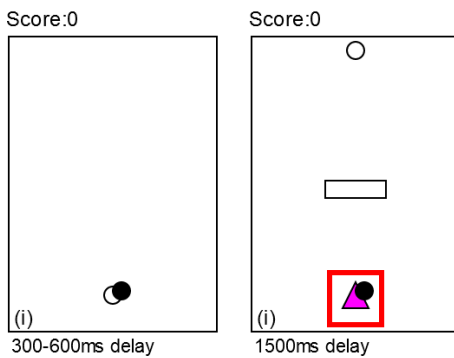

**c - Experiment 3 Trial Differences**

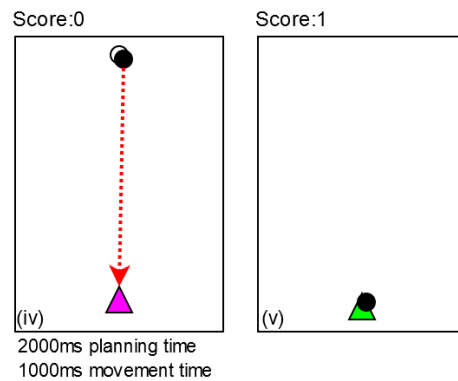

**d - Block Structure**

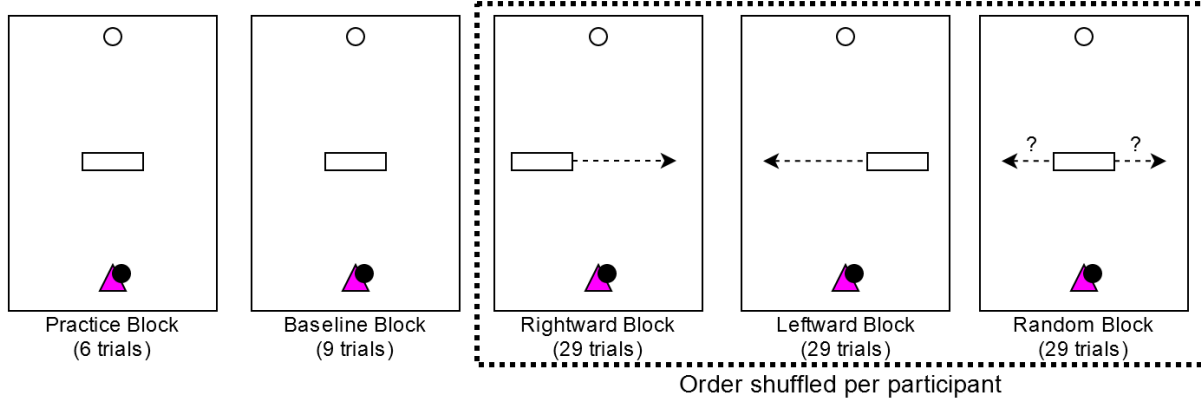

270

271 Figure 1. Trial and block structure of the experiments. (a) A complete trial for Experiment 1. Red dashed lines  
 272 indicate potential movement trajectories and filled circle indicates movement endpoint. In Step (i), participants  
 273 moved to a start-point and waited 300-600ms until it changed to a colour and a shape indicating the target  
 274 shape colour. Simultaneously, an obstacle and a checkpoint appeared. Participants were allowed 2000ms  
 275 planning time at the start-point before moving around the obstacle to the checkpoint (<500ms) and waited  
 276 300-600ms until 3 targets appeared. Participants were allowed up to 2000ms in the checkpoint before moving  
 277 to the target that matched the colour shown at the start-point (<1000ms). (b) For Experiment 2, step (i) of  
 278 Experiment 1 was replaced by two steps. Participants moved to a start-point and were immediately shown a  
 279 red box around the start-point, indicating they could not leave. After a random 300-600ms delay, the stimuli  
 280 were revealed but the red box remained on screen for a further 1500ms. (c) For Experiment 3, steps (iv) and

281 (v) of experiment 1 were changed so only one target was revealed, of the same colour and shape as the start-  
282 point. (d) The block structure of the experiments. Participants completed a practice and baselining block, where  
283 the obstacle was always central to the screen, before completing a shuffled order of the Rightwards block  
284 (obstacle moves from the left to the right between trials), Leftwards block (the obstacle moves from the right  
285 to the left between trials), and Random block (obstacle moves randomly between trials).

286

## 287 A Computational Model of Action Selection

288 Figure 2 shows a computational model where the selection of an action can be influenced by  
289 successful completion of a previous action (because the estimate of the probability of success is  
290 dynamically updated on a trial-by-trial basis).

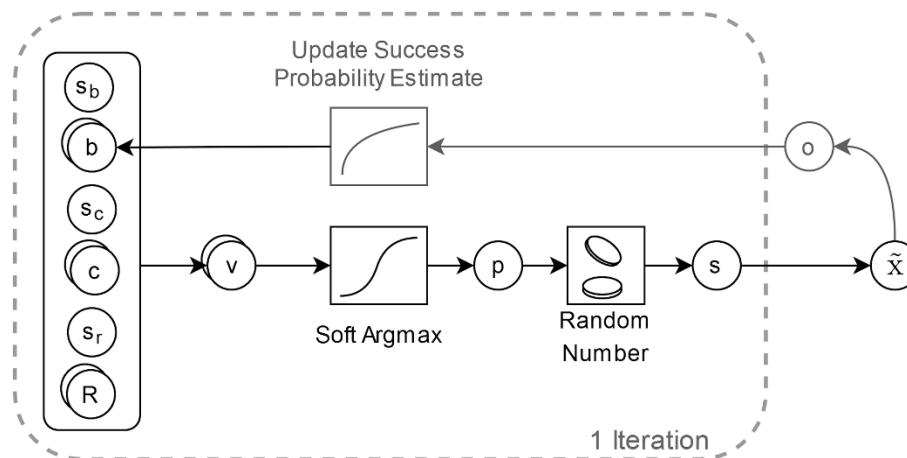

292 Figure 2. A probabilistic choice model for action selection. In a trial, the 'value' for the two actions (going left or  
293 right around the obstacle) is calculated from the current costs, rewards and biases built up over previous trials.  
294 The values are input to the soft argmax function which gives the probability of selecting the left action. A  
295 random number is uniformly sampled and if it is below the probability of the left action then left is selected,  
296 otherwise right is selected. The outcome of executing the associated action is observed and the selection and  
297 outcome are used to update the biases for each action according to a reinforcement learning rule.

298

299 The model weights the probability of action selection (going left or right around the obstacle)  
300 by the 'value' of each action, where we define value as a combination of the costs, rewards, and a  
301 bias term reflecting the increased probability of success from repeating the previous action. The  
302 model comprises four free parameters – a scaling parameter for each of the cost, bias, and reward  
303 terms,  $s_c$ ,  $s_b$ ,  $s_r$ , respectively, which are used to bring the terms to the same scale so the relative

304 importance of each can be compared, and the rate at which biases are accumulated,  $r$ , which has a  
305 value in the range  $[0, 1]$ . Formally, the ‘value’ of the action  $i$  is defined as:

$$V_i = \frac{s_c}{c_i} + s_b \times b_i + s_r \times R_i \quad (1)$$

306 where  $c$  is the expected cost,  $R$  is the reward and  $b$  is the action bias accumulated over the previous  
307 trials.  $R$  is normalised about the minimum reward, so a total reward of 1 vs 3 becomes a normalised  
308 reward of 0 vs 2, so that the effect of an additional reward can be isolated. In this formulation, the  
309 expected cost of an action is evaluated perfectly but the model could be modified to include a  
310 distribution of the possible expected costs for an action. The reciprocal of the costs was used as a  
311 high cost should give a lower valuation of the action, whereas a high reward should give a higher  
312 valuation (thus, no transformation was used). The value was converted to selection probabilities  
313 using the soft argmax function. A random number was sampled from a uniform distribution  
314 between 0 to 1, and the left action selected if the random number was below the output probability  
315 and vice versa.

316 Action selection and outcome were used to update the biases associated with each action,  
317 according to the following reinforcement learning formula:

$$b_{t+1,i} = \begin{cases} b_{t,i} + r(1 - b_{t,i}) & \text{if } i = s \\ b_{t,i} + r(0 - b_{t,i}) & \text{if } i \neq s \\ & \text{or } outcome_t = \text{fail} \end{cases} \quad (2)$$

318 where  $t$  is the current trial number,  $r$  is the bias rate, and  $s$  is the selected action. It is assumed  
319 participants start with no bias and thus, biases are set to zero on the first trial.

320 In the experiments, the reward for successfully completing either action was the same, so the  
321 reward term in the model was not included. For simplicity, this model assumed the cost function  
322 was the path length of the movement trajectory. In fact, there is considerable debate (Todorov,  
323 2004) within the sensorimotor research literature over the measure used for optimisation



324 (candidates include path length, movement duration, normalised jerk, end-point variability, torque  
325 etc). We note that most of these factors co-vary and emphasise that there is a strong tendency for  
326 participants to select the shortest possible movement trajectory in unconstrained task settings  
327 (Tresilian, 2012). The observed paths were smooth and roughly symmetrical about the centre (see  
328 Figure S1 in Supplementary Materials) so path length was approximated by fitting the shortest  
329 parabola capable of connecting the start point to the target whilst passing the obstacle on either  
330 side. To aid model convergence, path lengths were divided by the minimum possible path length  
331 (140mm).

332 The model was fit to the choice data for the three experiments using Bayesian estimation via  
333 Stan (Carpenter et al., 2017; version 2.18.2). Each model was fitted with eight chains of 5,000  
334 warmup samples and 5,000 iteration samples, giving 40,000 samples per posterior distribution.  
335 Convergence was assessed by visually inspecting chain behaviour and confirming the Gelman-  
336 Rubin statistic,  $\hat{R}$ , was below 1.1 (maximum 1.01) for all parameters (Gelman, 2004; Gelman &  
337 Rubin, 1992). Posterior distributions for each parameter were summarised using the 95% highest  
338 density interval (HDI), the 95% of most credible parameter estimates. The empirical priors used for  
339 model fitting are shown below. The scale of the model parameters was assessed by adjusting them  
340 until data containing hysteresis was observed. Aside from informing parameter scaling, the priors  
341 were then selected to be uninformative. Note that increasing the width of the priors doesn't affect  
342 the results of the modelling.

343 
$$s_c, s_b \sim N(0, 25)$$
$$r \sim N(0.5, 0.2)$$

344 To check the model fit, datasets were simulated using each experimental list of obstacle  
345 positions from the real data. For each experiment, 10,000 samples of the posterior distribution  
346 were drawn, and each combination was used to simulate a new data set. For each combination of  
347 experiment and obstacle position, the probability of committing an error, extracted from the

348 collected data, was used to simulate error trials. If a sampled number from a uniform distribution  
349 between 0 and 1 was below the error rate for the current experiment and obstacle position, the  
350 trial was classed as a failed trial and no action was selected. Each new dataset was summarised  
351 using a logistic fit for each of the three conditions, and at each obstacle position the minimum and  
352 maximum predicted probability of going right around the obstacle from all the logistic fits was  
353 taken, representing the credible range of possible data given the posterior distribution. The real  
354 data were then overlaid with the credible range to visualise the model fit.

### 355 **Data Analysis**

356 The output from Unity included the experimental condition; the cursor position, sampled at  
357 100Hz and output in millimetres; the timestamp when Unity's physics engine detected participants  
358 had left the start-point; the position of the obstacle, output on the scale -1 to 1, where -1 indicated  
359 the obstacle touched the left wall and 1 indicated the obstacle touched the right wall; the direction  
360 participants moved around the obstacle, detected by Unity's physics engine when participants  
361 moved past the leading edge of the obstacle; and the outcome of each trial. The extreme obstacle  
362 positions used were -0.9 and 0.9 (-34.2mm and 34.2mm respectively), which ensured participants  
363 could only go around the obstacle in one direction at these positions. The average error rate across  
364 the three experiments was 14.8%, 95% CI = [14.3, 15.4].

365 Stylus position data were filtered using a dual-pass Butterworth second-order filter with a cut-  
366 off frequency of 10Hz. To detect movement onset, the time where movement speed rose above  
367 50mm/s closest to the Unity's timestamp of the participant leaving the start-point was classed as  
368 movement start. For Experiment 1 and Experiment 3, reaction time (RT) was calculated as the  
369 difference in time between the obstacle being shown and movement start, whereas for Experiment  
370 2 it was the difference between the red box disappearing and movement starting.

371 RT data were pre-processed by removing trials where no RT was present (117 trials, 0.7%),  
372 where RTs were lower than 100ms (36 trials, 0.2%, to account for participants anticipating stimuli  
373 presentation), then grouping within participant and condition and removing trials outside 2SD of  
374 the mean (826 trials, 4.9%), and then grouping by condition and experiment and removing  
375 participant's conditions outside 2SD of the mean (240 trials, 1.4%). This RT data cleaning process  
376 was necessary to reduce heteroscedasticity and ensure normal residuals from models.

377 This process removed one participant (Experiment 1, mean RT = 608ms), six participant  
378 conditions (Experiment 1, mean RT = 587ms), and 1,219 trials in total (7.3% of observations) from  
379 the RT analysis. The remaining trials had a mean RT of 403ms. Of the trials removed, 7.2% were  
380 trials 1 and 2 in the experiment, likely because participants had only seen the obstacle presented  
381 central to the screen up to that point. Analysis performed on RT data was done on the inverse of RT  
382 to increase normality, and back-transformed when reporting. Choice data was pre-processed by  
383 removing trials where no movement past the obstacle was detected, removing 283 trials (1.7% of  
384 observations).

385 Analysis of the choice and RT data was performed using mixed-effect modelling, utilising the  
386 lme4 package in R (Bates et al., 2015; version 1.1-21). Following Barr et al. (2013), when the  
387 maximal random structure did not converge, the optimal random-effects structure was identified  
388 using forward model selection, with each mixed-effect model having a random intercept for  
389 participant. The effect of each variable was found using likelihood ratio testing, using the afex  
390 package (Singmann et al., 2019; version 0.23.0). Post-hoc comparisons were performed using the  
391 multcomp package (Hothorn et al., 2008; version 1.4.8), and corrections for multiple comparisons  
392 were made using the Bonferroni-Holm method. The MuMIn package (Barton, 2020; version 1.43.6)  
393 was used to report marginal  $R^2$  (variance explained by fixed effects),  $R_m^2$ , and conditional  $R^2$

394 (variance explained by fixed and random effects),  $R_c^2$ , for the models (Nakagawa et al., 2017). The  
395 95% confidence intervals for values are reported in square brackets throughout.

396 To examine changes in action selection, a mixed-effect logistic regression was performed. The  
397 fixed effects were the obstacle's position, the condition, the experiment, and all combinations of the  
398 interactions between these variables. The model had a random intercept for each participant. While  
399 a model with a random slope for obstacle position converged, the single repetition of each condition  
400 led to an artificially steep main effect slope of obstacle position, so was not included in the model.  
401 The default condition was Random, the default experiment was Experiment 1, and the default  
402 obstacle position was 0. To understand whether hysteresis changed with experiment, the log-odds  
403 (LO) of going right around the obstacle at the central obstacle position was compared between  
404 conditions. Hysteresis was quantified as the increased LO of going right at the central obstacle  
405 position in the Rightwards condition compared to the Leftwards condition. We compared this  
406 across experiments.

407 To investigate changes in RT, a mixed-effect linear regression was performed. The fixed effects  
408 were the trial number in the block, the condition, the experiment, and all combinations of the  
409 interactions between these variables. The model had a random intercept for participant, with  
410 random slopes of condition. The default condition was Random and the default experiment was  
411 Experiment 1. The trial number in block was centred about the middle trial. To understand how  
412 RTs were affected, the estimated marginal mean (EMM) RT at the central obstacle position was  
413 compared between conditions. The difference in RT between the sequential conditions and Random  
414 was then compared between experiments.

415 The large sample size in Experiment 1 presented opportunity for more detailed analysis of  
416 hysteresis. We expected that, while there would be no global hysteresis in the Random condition,  
417 participants might exhibit biases within this block on a trial-by-trial basis. To explore this, a mixed

418 effect logistic regression was performed to understand how much the previous trial biased the  
419 current trial inside the Random block. The fixed effects were the obstacle's position, the prime  
420 condition – whether the participant went left (Left Previous) or right (Right Previous) on the  
421 previous trial, and the interaction between the two. The model had a random intercept for  
422 participant. As with the analysis of choice with condition, a random slope of obstacle position was  
423 omitted to avoid artificially inflating the main effect slope of obstacle position. The default prime  
424 condition was Left Previous. The default obstacle position was 0. To understand how selection was  
425 influenced by the previous trial, the LO of going right at the central obstacle position was compared  
426 between prime conditions.

427 As well as choices being biased by the previous trial, we found RTs were shorter when  
428 participants repeated their previous action when compared to switching action. To investigate the  
429 relationship between RT and hysteresis, a mixed-effect linear regression was performed on the  
430 Random condition, splitting the data by whether the participant switched or repeated the previous  
431 trial's direction. The model had fixed effects of trial number, switch condition, and the interaction of  
432 the two, a random intercept for participant and a random slope of switch condition per participant.  
433 The default switch condition was repeated. The trial number in block was centred about the middle  
434 trial. The estimated mean RT at the central obstacle position was compared between switch  
435 conditions.

436 All statistical analyses and data processing were performed using custom-written scripts in R  
437 (R Core Team, 2018; version 3.5.2). Upon publication, all analyses code and model fits will be  
438 available through <https://github.com/immersivecognition>, and the complete dataset will be made  
439 available through the University of Leeds Data Repository.

440

## Results

### 441 Choice Analysis

442 We first examined whether our group-level manipulations resulted in action selection  
443 biases. Hysteresis would result in participants going right around the obstacle more often in the  
444 Rightwards condition (where the obstacle moved from the left of the screen to the right between  
445 trials) and going left around the obstacle more often in the Leftwards condition (where the obstacle  
446 moved from the right of the screen to the left between trials), whereas the Random block (where  
447 the obstacle moved randomly between trials) should show no overall bias. We predicted that the  
448 degree of this bias would diminish when participants were provided with more planning time  
449 (Experiment 2) and when action execution was performed under a reduced cognitive task load  
450 (Experiment 3).

451 The experimental task was successful in revealing hysteresis (Figure 3a), with the effect  
452 was diminished in Experiment 2 (Figure 3b) and Experiment 3 (Figure 3c).

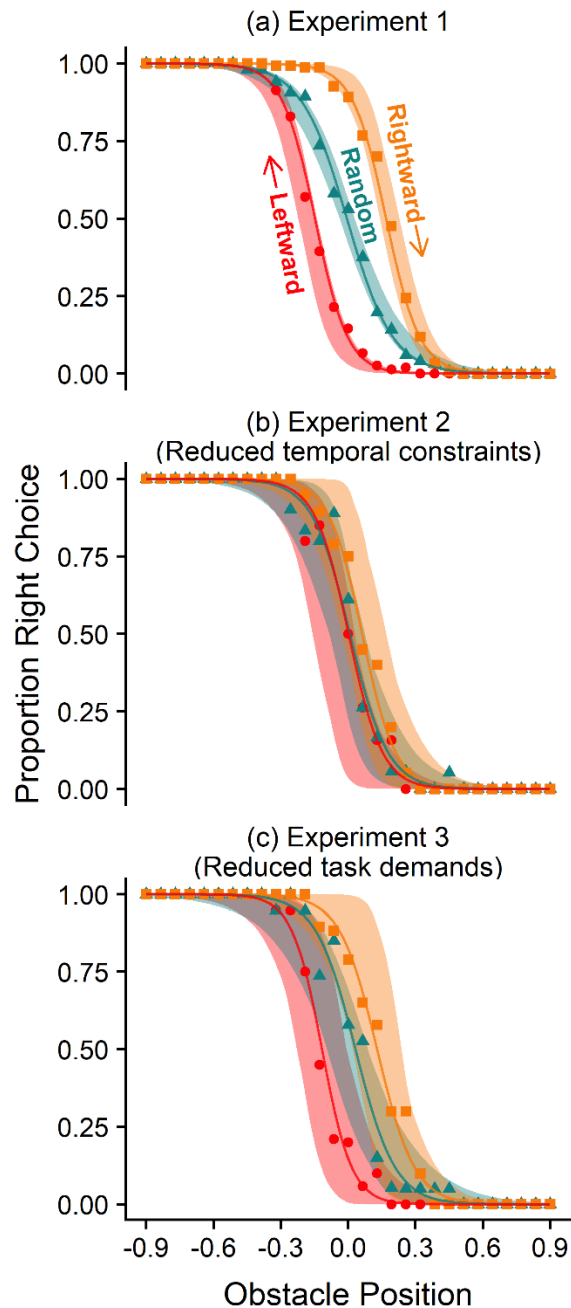

453

454 Figure 3. Comparison of experimental and simulated data for choices between experiments. The points and  
455 solid lines represent experimental data, and the ribbons represent simulated data. The points indicate mean  
456 proportion of participants who passed the obstacle on the right for each obstacle position. The solid lines  
457 represent the fit of a logistic regression for the experimental condition. Data was simulated using the decision-  
458 making model, with 10,000 samples of the posterior distribution used to simulate choices, and each new data  
459 set summarised with a logistic regression. The ribbon represents the minimum and maximum predicted  
460 probability of going right from the regressions of the simulated data. The conditions are Rightwards (where  
461 the obstacle moves from the left of the screen to right between trials), Random (where the obstacle moves  
462 randomly between trials), and Leftwards (where the obstacle moves from the right of the screen to left  
463 between trials).

464 We performed a mixed-effect logistic regression to predict the direction participants chose  
465 on a given trial. The model ( $\chi^2(17) = 18,206.60$ ,  $p < 0.001$ ,  $R_m^2 = 0.94$ ,  $R_c^2 = 0.95$ ) revealed a  
466 significant main effect of position ( $\chi^2(1) = 4,627.52$ ,  $p < 0.001$ ) and condition ( $\chi^2(2) = 1,330.53$ ,  $p <$   
467  $0.001$ ), but no significant effect of experiment ( $\chi^2(2) = 2.61$ ,  $p = 0.272$ ). There were significant  
468 interactions between position and condition ( $\chi^2(2) = 54.01$ ,  $p < 0.001$ ), and condition and  
469 experiment ( $\chi^2(4) = 94.53$ ,  $p < 0.001$ ), but no significant interaction between position and  
470 experiment ( $\chi^2(2) = 4.60$ ,  $p = 0.100$ ), or between position, condition and experiment ( $\chi^2(4) = 4.36$ ,  $p$   
471  $= 0.359$ ).

472 Bonferroni-Holm corrected comparisons were performed to see how the log-odds of passing  
473 the obstacle on the right changed with condition and experiment at the central obstacle position. In  
474 **Experiment 1**, participants were significantly more likely to go right in Rightwards compared to  
475 Random (LO = 2.52 [2.18, 2.86],  $p < 0.001$ ), and significantly less likely to go right in Leftwards  
476 compared to Random (LO = -2.18 [-2.51, -1.85],  $p < 0.001$ ), indicating participants were more likely  
477 to continue using the previous direction in the sequential conditions. Further, participants were  
478 more likely to go right in Rightwards compared to Leftwards (LO = 4.70 [4.28, 5.12],  $p < 0.001$ ).  
479 This comparison gives the increased log odds of passing the obstacle on the right at the central  
480 obstacle positions between the sequential conditions, and is the measure of hysteresis used  
481 throughout.

482 In **Experiment 2**, where participants were forced to wait in the start-point for 1.5 seconds  
483 while the obstacle was shown before being allowed to move, they were significantly more likely to  
484 go right in Rightwards compared to Random (LO = 0.82 [0.05, 1.59],  $p = 0.026$ ), but not in  
485 Leftwards compared to Random (LO = -0.07 [-0.80, 0.65],  $p = 0.811$ ). Furthermore, participants  
486 were more likely to go right in the Rightwards trials compared to Leftwards (LO = 0.89 [0.11, 1.68],  
487  $p = 0.023$ ), indicating hysteresis was present, but to a lesser extent compared to Experiment 1.



488 In **Experiment 3**, where participants were presented with a reduced cognitive task load, they  
489 were significantly more likely to go right in Rightwards compared to Random (LO = 1.24 [0.44,  
490 2.03],  $p < 0.001$ ), and significantly less likely to go right in Leftwards compared to Random (LO = -  
491 2.30 [-3.21, -1.39],  $p < 0.001$ ). Participants were more also likely to go right in Rightwards  
492 compared to Leftwards (LO = 3.54 [2.54, 4.54],  $p < 0.001$ ) indicating the presence of some  
493 hysteresis but attenuated relative to Experiment 1.

494 To investigate how the magnitude of hysteresis changed between the experiments, the  
495 increased log odds of going right in the Rightwards condition compared to the Leftwards condition  
496 were compared across experiments. Participants in Experiment 2 showed significantly less  
497 hysteresis than participants in Experiment 1 (LO = -3.81 [-4.70, -2.93],  $p < 0.001$ ), and participants  
498 in Experiment 3 also showed significantly less hysteresis than participants in Experiment 1 (LO = -  
499 1.16 [-0.09, -2.24],  $p = 0.012$ ).

500 These results indicate that the experiment interventions designed to: (i) decrease temporal  
501 constraints and (ii) decrease cognitive task load reduced the magnitude of hysteresis in  
502 Experiments 2 and 3 respectively (relative to Experiment 1). We note that the impact seems to be  
503 more pronounced for planning time increase (Experiment 2) relative to task load reduction  
504 (Experiment 3).

505 Simulations from the action selection model were fit with the experimental data. The 95% HDI  
506 of the posterior distributions for each parameter are summarised in Table 1 (the full posterior  
507 distributions for each parameter are visualised in Figure S2 in Supplementary Materials). To  
508 understand whether the bias changed between experiments, the posterior distribution for the bias  
509 scaler parameter in Experiments 2 and 3 were subtracted from that of Experiment 1. This showed  
510 that the bias scaler estimate in Experiment 2 was lower than in Experiment 1 (mean difference = -  
511 1.60, 95% HDI = [-1.18, -2.02]), and the estimate in Experiment 3 was also lower than in

512 Experiment 1 (mean difference = -0.82, 95% HDI = [-0.38, -1.25]), indicating hysteresis was  
513 attenuated by reducing the contribution of biases, built up through previous successes and failures,  
514 towards action selection under reduced temporal constraints and cognitive load.

515

Table 1

*Mean and 95% highest density interval (HDI) estimates of the decision-making model parameters.*

| Experiment                                     | Mean [95% HDI]       |                   |                   |
|------------------------------------------------|----------------------|-------------------|-------------------|
|                                                | Cost scaler          | Bias Scaler       | Bias Rate         |
| Experiment 1                                   | 39.26 [37.36, 41.24] | 2.69 [2.53, 2.86] | 0.32 [0.28, 0.36] |
| Experiment 2<br>(Reduced temporal constraints) | 41.96 [36.59, 47.84] | 1.09 [0.71, 1.48] | 0.43 [0.27, 0.62] |
| Experiment 3<br>(Reduced task demands)         | 37.63 [32.94, 42.82] | 1.87 [1.48, 2.29] | 0.35 [0.21, 0.50] |

516

517 The posterior distributions were then used to simulate new data so that predictions from the  
518 model could be compared to the experimental data. Ten thousand samples of the posterior  
519 distribution were taken, and each used to simulate new responses to the experiments. Each new  
520 dataset was summarised with a logistic regression for each condition, and the upper and lower limit  
521 for these predictions used to visualise the model's predictions. These predictions are shown as  
522 coloured ribbons in Figure 3 per experiment. Note that the observed selection probabilities lie  
523 within the range of the model's predictions, with distinct separations between the two sequential  
524 conditions for Experiments 1 and 3 around the central obstacle positions, but for Experiment 2 the  
525 two sequential conditions share considerable overlap, consistent with the experimental data.

526 The results thus far indicate participants are biased towards repeating previously used action  
527 structures when the obstacle moves between trials in a sequential manner. While most hysteresis

528 studies employ similar sequential trial designs, some have also found hysteresis when stimuli are  
529 varied randomly across trials (Jax & Rosenbaum, 2007; Valyear et al., 2018). Thus, we explored  
530 whether the participant's selection on a current trial was biased by the direction they passed the  
531 obstacle on the previous trial in the Random block. Analysis of the data for repeated and switched  
532 trials from the Random block in Experiment 1 provided support for this idea (Figure 4).

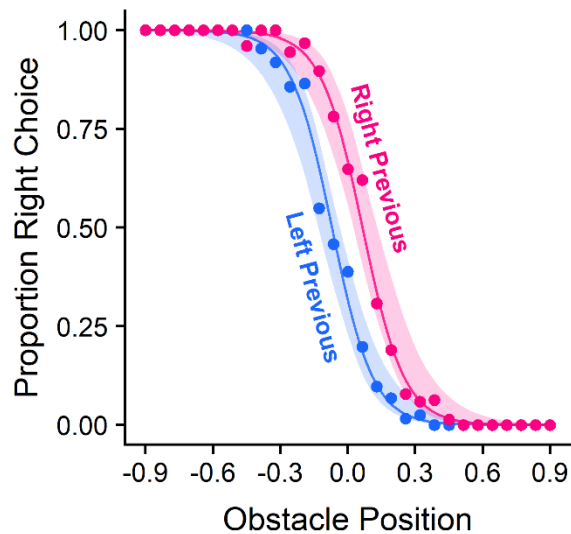

533

534 Figure 4. Empirical and simulated data for choices in Experiment 1 Random condition. The points and solid  
535 lines represent experimental data, and the ribbons represent simulated data. The points indicate mean  
536 proportion of participants who passed the obstacle on the left for each obstacle position. The solid lines  
537 represent the fit of a logistic regression for the experimental condition. Data were simulated using the decision-  
538 making model, with 10,000 samples of the posterior distribution used to simulate choices, and each new data  
539 set summarised with a logistic regression. The ribbon represents the minimum and maximum predicted  
540 probability of going right from the regressions of the simulated data. The conditions are Left Previous (where  
541 the participant passed the obstacle on the left on the previous trial), and Right Previous (where participants  
542 passed the obstacle on the right on the previous trial).

543

544 A mixed-effect logistic regression was performed on data from the Random block from  
545 Experiment 1 to predict the direction participants went on the current trial. The model ( $\chi^2(3) =$   
546 4,406.80,  $p < 0.001$ ,  $R_m^2 = 0.91$ ,  $R_c^2 = 0.93$ ) showed a significant main effect of position ( $\chi^2(1) =$   
547 2,215.09,  $p < 0.001$ ) and prime condition ( $\chi^2(1) = 96.62$ ,  $p < 0.001$ ), but there was no significant  
548 interaction between position and prime condition ( $\chi^2(1) = 0.16$ ,  $p = 0.688$ ). A comparison was

549 performed to see how the log-odds of passing the obstacle on the right changed with prime  
550 condition at the central obstacle position. Participants were significantly more likely to go right in  
551 the Right Previous condition compared to the Left Previous condition (LO = 1.51 [1.19, 1.83],  $p <$   
552 0.001). The increased log odds of going right were smaller for the two prime conditions when  
553 compared to the two sequential conditions from the analysis reported above - indicating biases  
554 accumulate over longer action sequences than just the previous trial.

555 To understand whether similar trial-to-trial biases emerged in the decision-making model, the  
556 parameter posterior distributions (10,000 samples) from Experiment 1 were used to simulate new  
557 datasets. The responses to the Random condition were then extracted, and each new dataset was  
558 summarised using a logistic regression per prime condition. The minimum and maximum predicted  
559 probability of going right from these regressions was used to visualise the model's predictions and  
560 are represented as ribbons in Figure 4. Consistent with the observed experiment data, the model  
561 shows a distinct separation between the two prime conditions, with Right Previous cases being  
562 more likely to go right at the central obstacle positions.

### 563 **Reaction Times Analysis**

564 Participants in Experiment 1 showed a reduction in RT in the sequential conditions compared  
565 to the Random condition (Figure 5a). Collapsing across all trials, the mean RT in the Random  
566 condition was 417ms [414, 419], compared to 387ms [385, 389] in the Rightwards condition and  
567 388ms [386, 390] in the Leftwards condition. In Experiment 2, RTs were lower than in Experiment  
568 1 and there seemed to be no RT benefits in the sequential conditions (Figure 5b), with a mean RT in  
569 the Random condition of 368ms [363, 373] compared to 381ms [375, 387] in the Rightwards  
570 condition and 380ms [374, 386] in the Leftwards condition. In Experiment 3, RTs were again lower  
571 than in Experiment 1 with a large RT benefit in the sequential conditions (Figure 5c). The mean RT

572 in the Random condition was 379ms [374, 385] compared to 331ms [327, 336] in the Rightwards  
573 condition and 342ms [337, 347] in the Leftwards condition.

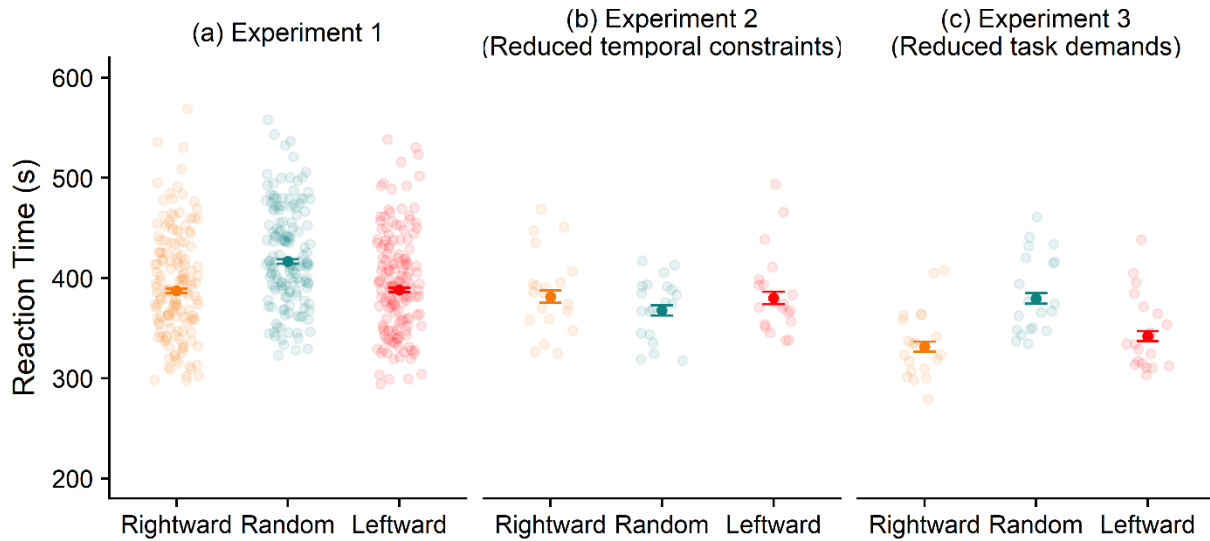

574

575 Figure 5. Comparison of RTs for each condition between experiments. The open circles show the mean RTs  
576 for each participant. The solid circles show the mean RT for each combination of condition and experiment  
577 across all participants, and the error bars show the 95% confidence intervals around the estimate of the  
578 mean. The conditions are Rightwards (where the obstacle moves from the left of the screen to the right  
579 between trials), Random (where the obstacle moves randomly between trials), and Leftwards (where the  
580 obstacle moves from the right of the screen to the left between trials).

581

582 To understand how RTs were affected by biases, a linear mixed-effect model was conducted to  
583 predict RTs on a given trial. The model [ $\chi^2(22) = 2,337.69, p < 0.001, R_m^2 = 0.10, R_c^2 = 0.49$ ] showed a  
584 significant main effect of trial ( $\chi^2(1) = 7.53, p = 0.006$ ), condition ( $\chi^2(2) = 104.22, p < 0.001$ ), and  
585 experiment ( $\chi^2(2) = 30.30, p < 0.001$ ). There were significant interactions of trial and condition  
586 ( $\chi^2(2) = 28.45, p < 0.001$ ), and condition and experiment ( $\chi^2(4) = 50.58, p < 0.001$ ), but no  
587 significant interaction between trial and experiment ( $\chi^2(2) = 2.47, p = 0.291$ ). There was a  
588 significant interaction between trial, condition and experiment ( $\chi^2(4) = 19.72, p < 0.001$ ).

589 Bonferroni-Holm corrected comparisons were performed to see how RTs changed with  
590 condition and experiment at the middle trial in the block, where the benefits of hysteresis would be

591 expected. In **Experiment 1**, the Random condition (EMM = 417ms [410, 425]) was significantly  
592 slower than the Leftwards (EMM = 389ms [381, 397],  $p < 0.001$ ) and Rightwards conditions (EMM  
593 = 387ms [380, 396],  $p < 0.001$ ), but there was no significant difference between the Leftwards and  
594 Rightwards conditions ( $p = 0.659$ ). Participants were ~30ms faster in the sequential conditions  
595 than in the Random condition, indicating RT savings from choice perseveration.

596 In **Experiment 2**, there were no significant differences between the Random (EMM = 368ms  
597 [352, 385]) and Leftwards condition (EMM = 380ms [361, 402],  $p = 0.151$ ), the Random and  
598 Rightwards condition (EMM = 382ms [361, 404],  $p = 0.151$ ), or between the Leftwards and  
599 Rightwards condition ( $p = 0.877$ ).

600 In **Experiment 3**, the Random condition (EMM = 380ms [363, 398]) was significantly slower  
601 than the Leftwards (EMM = 342ms [326, 359],  $p < 0.001$ ) and Rightwards conditions (EMM = 331ms  
602 [316, 348],  $p < 0.001$ ), but there was no significant difference between the Leftwards and  
603 Rightwards conditions ( $p = 0.093$ ). Participants were 40-50ms quicker in the sequential conditions  
604 than in the Random condition, showing savings that were marginally larger than those observed in  
605 Experiment 1.

606 To investigate whether the magnitude of RT reduction changed between experiments, we  
607 compared the difference in RT of the Random condition to the sequential conditions between  
608 experiments. The difference in RT between the Random and Leftwards conditions was significantly  
609 lower in Experiment 2 compared to Experiment 1 ( $p < 0.001$ ), but significantly higher in  
610 Experiment 3 compared to Experiment 1 ( $p = 0.005$ ). The difference in RT between the Random  
611 and Leftwards conditions was significantly lower in Experiment 2 compared to Experiment 1 ( $p <$   
612  $0.001$ ) but there was no difference between Experiment 3 and 1 ( $p = 0.074$ ).

613 In the Random block of Experiment 1 participants showed a reduction in RT for repeated  
614 choices compared to switched choices (Figure 6). Collapsing across all trials and participants, the

615 mean RT in the Repeated condition was 407ms [404, 410] compared to 430ms [427, 433] in the  
616 Switched condition.

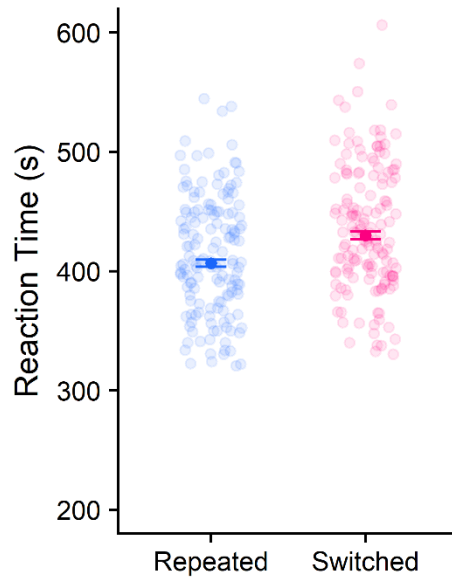

617

618 Figure 6. Comparison of RTs inside Experiment 1's Random condition. The open circles show the mean RTs  
619 for each participant. The solid circles show the mean RT for each switch condition across all participants, and  
620 the error bars show the 95% confidence intervals around the estimate of the mean. The conditions are  
621 Repeated (where participants made the same choice on the current trial as on the last trial), and Switched  
622 (where participants switched choice from the previous trial).

623

624 To understand how RTs changed with switch condition on a given trial, a linear mixed-effect  
625 model was performed. The model [ $\chi^2(5) = 197.71, p < 0.001, R_m^2 = 0.03, R_c^2 = 0.48$ ] showed a  
626 significant main effect of trial ( $\chi^2(1) = 14.23, p < 0.001$ ) and switch condition ( $\chi^2(1) = 97.79, p <$   
627  $0.001$ ), but no interaction between trial and switch condition ( $\chi^2(1) = 0.19, p = 0.663$ ). A  
628 comparison was performed to see how RTs changed with switch condition at the middle trial in the  
629 block. The repeated condition (EMM = 407ms [400, 415]) was significantly faster than the switched  
630 condition (EMM = 429ms [421, 438],  $p < 0.001$ ), indicating participants had an RT benefit from  
631 repeating only a single previous choice. The difference between the Switched and Repeated

632 conditions was lower than the difference between the Random and the sequential conditions from  
633 the earlier analysis, indicating RT savings may be a cumulative process, building up across trials.



634

## Discussion

635 Our goal was to examine the bias shown by skilled adult humans towards selecting a  
636 previously selected action structure when alternative options that would be selected in *de novo*  
637 conditions were available. To this end, we created a simple obstacle avoidance aiming task. We  
638 found participants exhibited hysteresis effects when the obstacle moved systematically in one  
639 direction between trials. In blocks where the obstacle moved randomly, there was no global  
640 hysteresis effect. The random blocks did, however, show trial-by-trial biases - with action selection  
641 being influenced by the previous movement. We were also interested in exploring the impact on  
642 hysteresis of changing the temporal constraints of the task. The rationale for manipulating the  
643 temporal constraints was based on the growing evidence that human decision-making involves  
644 evidence accumulation processes. The existence of such processes suggests that humans may  
645 choose to act before a full evaluation of the costs associated with the available action options has  
646 been completed (i.e. as soon as an action reaches a threshold it is selected). It follows that providing  
647 a longer time period for decision-making might cause a different action to be selected (as the  
648 available time can be used to more fully evaluate the costs, reducing the reliance of the current  
649 decision on previous successes and failures). We used two manipulations to alter the temporal  
650 constraints of the task. In Experiment 2, we directly manipulated the temporal constraints by  
651 preventing action until a 1500ms time window had elapsed. In Experiment 3, we indirectly altered  
652 the constraints by decreasing the cognitive demands of the task (reasoning that less time spent  
653 identifying the task goal would provide more time for evaluating the respective costs of the  
654 available actions). The results showed that the hysteresis effect was practically eliminated in  
655 Experiment 2 and attenuated in Experiment 3.

656 Our investigation of hysteresis was motivated by our hypothesis that hysteresis is the  
657 naturally emergent property of a dynamical learning system that is operating in an uncertain world.  
658 In order to test our hypothesis we created a simple POMDP type computational model that

659 incorporated dynamic probabilistic estimate updating. We used this model to simulate behavioural  
660 responses for the experimental tasks and found that it was able to capture the empirical data. This  
661 finding suggests that there is no need to invoke the existence of a bespoke ‘hysteresis function’  
662 within the sensorimotor system, and provides support for our hypothesis that hysteresis is an  
663 emergent property of a dynamical learning system.

664       The results reported within this manuscript emphasise the dynamical nature of human  
665 sensorimotor decision making. The challenge for the human nervous system is to maintain optimal  
666 action selection in a noisy and uncertain world. The only way that the nervous system can maintain  
667 its efficiency is through an ongoing evaluation of the accuracy of its internal representation of the  
668 external world, and frequent updating of its probability estimates. The current findings suggest that  
669 this updating occurs on a trial-by-trial basis (though the biases we observed also accumulated  
670 across multiple trials). This paints a picture of a system that is continually adapting, and ensuring  
671 that its actions are precisely tailored to the external environment. This observation calls into  
672 question the classical distinctions between sensorimotor control and sensorimotor learning. It  
673 appears that human control systems appear stable because they have been refined over long  
674 periods of time through interactions with a world that obeys consistent rules described by  
675 Newtonian mechanics– but controllers are nevertheless updated continually on the basis of  
676 feedback from every interaction. Our findings also highlight the dynamics of decision-making in  
677 terms of the system needing to make choices under time constraints (where there are strong  
678 evolutionary pressures favouring species who react swiftly). In line with the existence of evidence  
679 accumulation processes, we found that the hysteresis effect was attenuated when the temporal  
680 constraints of the task were eased. This emphasises the tendency within the system to select the  
681 first action to cross a pre-specified threshold, favouring recently successful actions, rather than wait  
682 until the full costs of all options have been exhaustively evaluated. The success of such a strategy is

683 witnessed by the fact that *Homo sapiens* remained standing after the evolutionary arms race of the  
684 past gigayear.

685 Our experiments have focussed on the sensorimotor system but the general phenomenon of  
686 hysteresis can be observed in other aspects of human behaviour. For example, hysteresis effects  
687 have been observed in perceptual decision-making tasks where choices are biased by previous  
688 decisions (Abrahamyan et al., 2016; Akaishi et al., 2014; Urai et al., 2019). The magnitude of the  
689 perceptual bias tends to depend on whether the previous decision was rewarded or not  
690 (Abrahamyan et al., 2016; Hermoso-Mendizabal et al., 2018). These hysteresis effects (typically  
691 described as choice-history biases) have been successfully implemented in evidence accumulation  
692 models of decision-making. We argue that the existence of hysteresis within the perceptual system  
693 can be explained through the same mechanisms that we used to account for hysteresis in  
694 sensorimotor decision-making (i.e. the presence of Bayesian type processes operating within the  
695 brain, where priors are continually updated with new sensory information to create posterior  
696 probability estimates). It is possible that similar mechanisms can account for reports of hysteresis  
697 in higher order cognition (often described as ‘perseveration’). There is a growing consensus that  
698 the sensorimotor system provides the phylogenetic and ontogenetic foundations of higher order  
699 cognition (Raw et al., 2019; Wilson, 2002). The postulated links between the sensorimotor and  
700 cognitive system might suggest a close relationship between sensorimotor hysteresis and  
701 perseveration type behaviours. This may prove a fruitful line of investigation for future studies.

702 Previous accounts of hysteresis have assumed that the sensorimotor system has a ‘hysteresis’  
703 function whose purpose is to create an advantage when planning a new movement. It is argued that  
704 modifying a previously used plan would be more cognitively efficient than planning a new one from  
705 scratch, so hysteresis exists to improve planning efficiency (Meulenbroek et al., 1993; Rosenbaum  
706 et al., 2007; Schütz & Schack, 2019; Weiss & Wark, 2009), as indexed by reduced RTs when

707 performing the same action as previously (Valyear et al., 2018). On the basis of previous reports we  
708 fully expected to find reduced RTs when the hysteresis effect was present. Moreover, we  
709 anticipated the presence of reduced RTs on the theoretical basis that evidence accumulation  
710 processes will cause actions to be selected more rapidly when there is a bias towards one action  
711 versus another. In line with these expectations, we observed a decrease in the average RT on the  
712 sequential trials in Experiment 1 relative to the random trials. In Experiment 2, participants were  
713 given a substantial time to select the goal directed action and the RTs were similar to the sequential  
714 trials in Experiment 1 regardless of trial type. In Experiment 3, the task demands were decreased  
715 and there was a commensurate reduction in RT (consistent with a large body of literature showing  
716 that RT is a function of task complexity). Notably, the sequential trials within Experiment 3 showed  
717 hysteresis (relative to the random trials within the experiment) and were associated with faster  
718 RTs than the random trials (producing the fastest RTs across all three experiments as predicted by  
719 the presence of hysteresis and the reduced task complexity).

720       The work presented within this manuscript addresses issues from the field of ‘Human-Like-  
721 Computing’ where researchers attempt to bridge the gap between models of human decision-  
722 making and the models used in artificial intelligence and robot motion control. Stochastic models of  
723 actions, observations, costs and rewards are the main tools used in modelling and planning robot  
724 motion, including tasks that involve reaching behind obstacles (Dogar & Srinivasa, 2012). An  
725 improved understanding of human decision-making can inform the development of such robot  
726 motion models. The identification of the hysteresis bias allows roboticists and computer scientists  
727 to decide whether their agents are operating within environments that are sufficiently constrained  
728 so that control schemes can seek to ameliorate hysteresis. Alternatively, hysteresis may suggest  
729 mechanisms through which a robotic agent can show human-like flexibility and adaptability in  
730 complex dynamic environments. Moreover, the identification of hysteresis as an emergent property  
731 can help improve the legibility and predictability available within human-robot interactions. It

732 follows that investigations into human biases (such as hysteresis), and their formal description  
733 through mathematical models can be useful in robot motion and control. Thus, the approach  
734 adopted within this manuscript provides an interesting avenue for future investigations by  
735 roboticists, psychologists and computer scientists.

736

## References

- 737 Abrahamyan, A., Silva, L. L., Dakin, S. C., Carandini, M., & Gardner, J. L. (2016). Adaptable history biases  
738 in human perceptual decisions. *Proceedings of the National Academy of Sciences*, *113*(25), E3548–  
739 E3557. <https://doi.org/10.1073/pnas.1518786113>
- 740 Akaishi, R., Umeda, K., Nagase, A., & Sakai, K. (2014). Autonomous Mechanism of Internal Choice  
741 Estimate Underlies Decision Inertia. *Neuron*, *81*(1), 195–206.  
742 <https://doi.org/10.1016/j.neuron.2013.10.018>
- 743 Barr, D. J., Levy, R., Scheepers, C., & Tily, H. J. (2013). Random effects structure for confirmatory  
744 hypothesis testing: Keep it maximal. *Journal of Memory and Language*, *68*(3), 255–278.  
745 <https://doi.org/10.1016/j.jml.2012.11.001>
- 746 Barton, K. (2020). *MuMIn: Multi-model inference* (Version 1.43.6) [Computer software]. [https://CRAN.R-](https://CRAN.R-project.org/package=MuMIn)  
747 [project.org/package=MuMIn](https://CRAN.R-project.org/package=MuMIn)
- 748 Bates, D., Mächler, M., Bolker, B., & Walker, S. (2015). Fitting linear mixed-effects models using lme4.  
749 *Journal of Statistical Software*, *67*(1), 1–48. <https://doi.org/10.18637/jss.v067.i01>
- 750 Bogacz, R., Brown, E., Moehlis, J., Holmes, P., & Cohen, J. D. (2006). The physics of optimal decision  
751 making: A formal analysis of models of performance in two-alternative forced-choice tasks.  
752 *Psychological Review*, *113*(4), 700–765. <https://doi.org/10.1037/0033-295X.113.4.700>
- 753 Brody, C. D., & Hanks, T. D. (2016). Neural underpinnings of the evidence accumulator. *Current Opinion*  
754 *in Neurobiology*, *37*, 149–157. <https://doi.org/10.1016/j.conb.2016.01.003>
- 755 Brookes, J., Warburton, M., Alghadier, M., Mon-Williams, M., & Mushtaq, F. (2019). Studying human  
756 behavior with virtual reality: The Unity Experiment Framework. *Behavior Research Methods*, *52*,  
757 455–463. <https://doi.org/10.3758/s13428-019-01242-0>
- 758 Carpenter, B., Gelman, A., Hoffman, M. D., Lee, D., Goodrich, B., Betancourt, M., Brubaker, M., Guo, J.,  
759 Li, P., & Riddell, A. (2017). Stan: A Probabilistic Programming Language. *Journal of Statistical*  
760 *Software*, *76*(1), 1–32. <https://doi.org/10.18637/jss.v076.i01>

- 761 Cohen, R. G., & Rosenbaum, D. A. (2004). Where grasps are made reveals how grasps are planned:  
762 Generation and recall of motor plans. *Experimental Brain Research*, 157(4), 486–495.  
763 <https://doi.org/10.1007/s00221-004-1862-9>
- 764 Cohen, R. G., & Rosenbaum, D. A. (2011). Prospective and retrospective effects in human motor control:  
765 Planning grasps for object rotation and translation. *Psychological Research*, 75(4), 341–349.  
766 <https://doi.org/10.1007/s00426-010-0311-6>
- 767 Dixon, P., McAnsh, S., & Read, L. (2012). Repetition effects in grasping. *Canadian Journal of*  
768 *Experimental Psychology/Revue Canadienne de Psychologie Expérimentale*, 66(1), 1–17.  
769 <https://doi.org/10.1037/a0026192>
- 770 Dogar, M. R., & Srinivasa, S. S. (2012). A Planning Framework for Non-Prehensile Manipulation under  
771 Clutter and Uncertainty. *Autonomous Robots*, 33(3), 217–236. [https://doi.org/10.1007/s10514-012-](https://doi.org/10.1007/s10514-012-9306-z)  
772 [9306-z](https://doi.org/10.1007/s10514-012-9306-z)
- 773 Dreher, J.-C., & Tremblay, L. (Eds.). (2009). *Handbook of reward and decision making*. Academic Press.
- 774 Friston, K. (2010). The free-energy principle: A unified brain theory? *Nature Reviews Neuroscience*, 11(2),  
775 127–138. <https://doi.org/10.1038/nrn2787>
- 776 Gelman, A. (2004). *Bayesian data analysis* (Second edition.). Chapman & Hall/CRC.
- 777 Gelman, A., & Rubin, D. B. (1992). Inference from Iterative Simulation Using Multiple Sequences.  
778 *Statistical Science*, 7(4), 457–472. <https://doi.org/10.1214/ss/1177011136>
- 779 Gold, J. I., & Shadlen, M. N. (2007). The Neural Basis of Decision Making. *Annual Review of*  
780 *Neuroscience*, 30(1), 535–574. <https://doi.org/10.1146/annurev.neuro.29.051605.113038>
- 781 Hermoso-Mendizabal, A., Hyafil, A., Rueda-Orozco, P. E., Jaramillo, S., Robbe, D., & de la Rocha, J.  
782 (2018). *Response outcomes gate the impact of expectations on perceptual decisions* [Preprint].  
783 <https://doi.org/10.1101/433409>
- 784 Hothorn, T., Bretz, F., & Westfall, P. (2008). Simultaneous inference in general parametric models.  
785 *Biometrical Journal*, 50(3), 346–363. <https://doi.org/10.1002/bimj.200810425>

- 786 Jax, S. A., & Rosenbaum, D. A. (2007). Hand path priming in manual obstacle avoidance: Evidence that  
787 the dorsal stream does not only control visually guided actions in real time. *Journal of Experimental*  
788 *Psychology: Human Perception and Performance*, *33*(2), 425–441. [https://doi.org/10.1037/0096-](https://doi.org/10.1037/0096-1523.33.2.425)  
789 [1523.33.2.425](https://doi.org/10.1037/0096-1523.33.2.425)
- 790 Jax, S. A., & Rosenbaum, D. A. (2009). Hand path priming in manual obstacle avoidance: Rapid decay of  
791 dorsal stream information. *Neuropsychologia*, *47*(6), 1573–1577.  
792 <https://doi.org/10.1016/j.neuropsychologia.2008.05.019>
- 793 Kaelbling, L. P., Littman, M. L., & Cassandra, A. R. (1998). Planning and acting in partially observable  
794 stochastic domains. *Artificial Intelligence*, *101*(1–2), 99–134. [https://doi.org/10.1016/S0004-](https://doi.org/10.1016/S0004-3702(98)00023-X)  
795 [3702\(98\)00023-X](https://doi.org/10.1016/S0004-3702(98)00023-X)
- 796 Kelso, J. A. S., Buchanan, J. J., & Murata, T. (1994). Multifunctionality and switching in the coordination  
797 dynamics of reaching and grasping. *Human Movement Science*, *13*(1), 63–94.  
798 [https://doi.org/10.1016/0167-9457\(94\)90029-9](https://doi.org/10.1016/0167-9457(94)90029-9)
- 799 Kent, S. W., Wilson, A. D., Plumb, M. S., Williams, J. H. G., & Mon-Williams, M. (2009). Immediate  
800 Movement History Influences Reach-to-Grasp Action Selection in Children and Adults. *Journal of*  
801 *Motor Behavior*, *41*(1), 10–15. <https://doi.org/10.1080/00222895.2009.10125921>
- 802 Meulenbroek, R. G. J., Rosenbaum, D. A., Thomassen, A. J. W. M., & Schomaker, L. R. B. (1993). Limb-  
803 Segment Selection in Drawing Behaviour. *The Quarterly Journal of Experimental Psychology*  
804 *Section A*, *46*(2), 273–299. <https://doi.org/10.1080/14640749308401047>
- 805 Mushtaq, F., Wilkie, R. M., Mon-Williams, M. A., & Schaefer, A. (2016). Randomised prior feedback  
806 modulates neural signals of outcome monitoring. *NeuroImage*, *125*, 868–879.  
807 <https://doi.org/10.1016/j.neuroimage.2015.10.046>
- 808 Nakagawa, S., Johnson, P. C. D., & Schielzeth, H. (2017). The coefficient of determination R<sup>2</sup> and intra-  
809 class correlation coefficient from generalized linear mixed-effects models revisited and expanded.  
810 *Journal of the Royal Society Interface*, *14*(134), 1–11. <https://doi.org/10.1098/rsif.2017.0213>



- 811 R Core Team. (2018). *R: A Language and Environment for Statistical Computing* (Version 3.5.2)  
812 [Computer software]. <https://www.R-project.org/>
- 813 Raw, R. K., Wilkie, R. M., Allen, R. J., Warburton, M., Leonetti, M., Williams, J. H. G., & Mon-Williams,  
814 M. (2019). Skill acquisition as a function of age, hand and task difficulty: Interactions between  
815 cognition and action. *PLoS ONE*, *14*(2). <https://doi.org/10.1371/journal.pone.0211706>
- 816 Rosenbaum, D. A., Cohen, R. G., Jax, S. A., Weiss, D. J., & van der Wel, R. (2007). The problem of serial  
817 order in behavior: Lashley's legacy. *Human Movement Science*, *26*(4), 525–554.  
818 <https://doi.org/10.1016/j.humov.2007.04.001>
- 819 Rosenbaum, D. A., & Jorgensen, M. J. (1992). Planning macroscopic aspects of manual control. *Human*  
820 *Movement Science*, *11*(1–2), 61–69. [https://doi.org/10.1016/0167-9457\(92\)90050-L](https://doi.org/10.1016/0167-9457(92)90050-L)
- 821 Rostoft, M. S., Sigmundsson, H., Whiting, H. T. A., & Ingvaldsen, R. P. (2002). Dynamics of hand  
822 preference in 4 year-old children. *Behavioural Brain Research*, *132*(1), 59–68.  
823 [https://doi.org/10.1016/S0166-4328\(01\)00415-6](https://doi.org/10.1016/S0166-4328(01)00415-6)
- 824 Schütz, C., & Schack, T. (2019). A Simple Model to Estimate the Percentage of Motor Plan Reuse From  
825 Hysteresis Effect Size. *Frontiers in Psychology*, *10*, 1–9. <https://doi.org/10.3389/fpsyg.2019.00561>
- 826 Schütz, C., Weigelt, M., Odekerken, D., Klein-Soetebier, T., & Schack, T. (2011). Motor Control Strategies  
827 in a Continuous Task Space. *Motor Control*, *15*(3), 321–341. <https://doi.org/10.1123/mcj.15.3.321>
- 828 Schweighofer, N., Xiao, Y., Kim, S., Yoshioka, T., Gordon, J., & Osu, R. (2015). Effort, success, and  
829 nonuse determine arm choice. *Journal of Neurophysiology*, *114*(1), 551–559.  
830 <https://doi.org/10.1152/jn.00593.2014>
- 831 Short, M. W., & Cauraugh, J. H. (1997). Planning macroscopic aspects of manual control: End-state  
832 comfort and point-of-change effects. *Acta Psychologica*, *96*(1–2), 133–147.  
833 [https://doi.org/10.1016/S0001-6918\(97\)00006-1](https://doi.org/10.1016/S0001-6918(97)00006-1)
- 834 Singmann, H., Bolker, B., Westfall, J., & Aust, F. (2019). *afex: Analysis of factorial experiments* (Version  
835 0.23.0) [Computer software]. <https://CRAN.R-project.org/package=afex>

- 836 Todorov, E. (2004). Optimality principles in sensorimotor control. *Nature Neuroscience*, 7(9), 907–915.  
837 <https://doi.org/10.1038/nn1309>
- 838 Tresilian, J. (2012). *Sensorimotor Control & Learning: An Introduction to the Behavioural Neuroscience*  
839 *of Action*. Palgrave Macmillan.
- 840 Trommershäuser, J., Maloney, L. T., & Landy, M. S. (2008). Decision making, movement planning and  
841 statistical decision theory. *Trends in Cognitive Sciences*, 12(8), 291–297.  
842 <https://doi.org/10.1016/j.tics.2008.04.010>
- 843 Unity Technologies. (2018). *Unity* (Version 2018.1) [Computer software]. <https://unity3d.com>
- 844 Urai, A. E., de Gee, J. W., Tsetsos, K., & Donner, T. H. (2019). Choice history biases subsequent evidence  
845 accumulation. *ELife*, 8, 1–34. <https://doi.org/10.7554/eLife.46331>
- 846 Valyear, K. F., Fitzpatrick, A. M., & Dundon, N. M. (2018). Now and then: Hand choice is influenced by  
847 recent action history. *Psychonomic Bulletin & Review*, 26, 305–314.  
848 <https://doi.org/10.3758/s13423-018-1510-1>
- 849 van der Wel, R. P. R. D., Fleckenstein, R. M., Jax, S. A., & Rosenbaum, D. A. (2007). Hand path priming  
850 in manual obstacle avoidance: Evidence for abstract spatiotemporal forms in human motor control.  
851 *Journal of Experimental Psychology: Human Perception and Performance*, 33(5), 1117–1126.  
852 <https://doi.org/10.1037/0096-1523.33.5.1117>
- 853 Weigelt, M., Rosenbaum, D. A., Huelshorst, S., & Schack, T. (2009). Moving and memorizing: Motor  
854 planning modulates the recency effect in serial and free recall. *Acta Psychologica*, 132(1), 68–79.  
855 <https://doi.org/10.1016/j.actpsy.2009.06.005>
- 856 Weiss, D. J., & Wark, J. (2009). Hysteresis effects in a motor task with cotton-top tamarins (*Sanguinus*  
857 *oedipus*). *Journal of Experimental Psychology: Animal Behavior Processes*, 35(3), 427–433.  
858 <https://doi.org/10.1037/a0013964>
- 859 Wilson, M. (2002). Six views of embodied cognition. *Psychonomic Bulletin & Review*, 9(4), 625–636.  
860 <https://doi.org/10.3758/BF03196322>
- 861
